# Supplementary material for: Genomic and phylogenetic characterization of ChPV2, a novel goat PV closely related to the Xi-PV1 species infecting bovines
Source: Springer Nature journal article supplement (doi:10.1186/s12985-020-01440-9), 2020-10-30
Supplement: MOESM1 [file 18539532]

## Supporting data

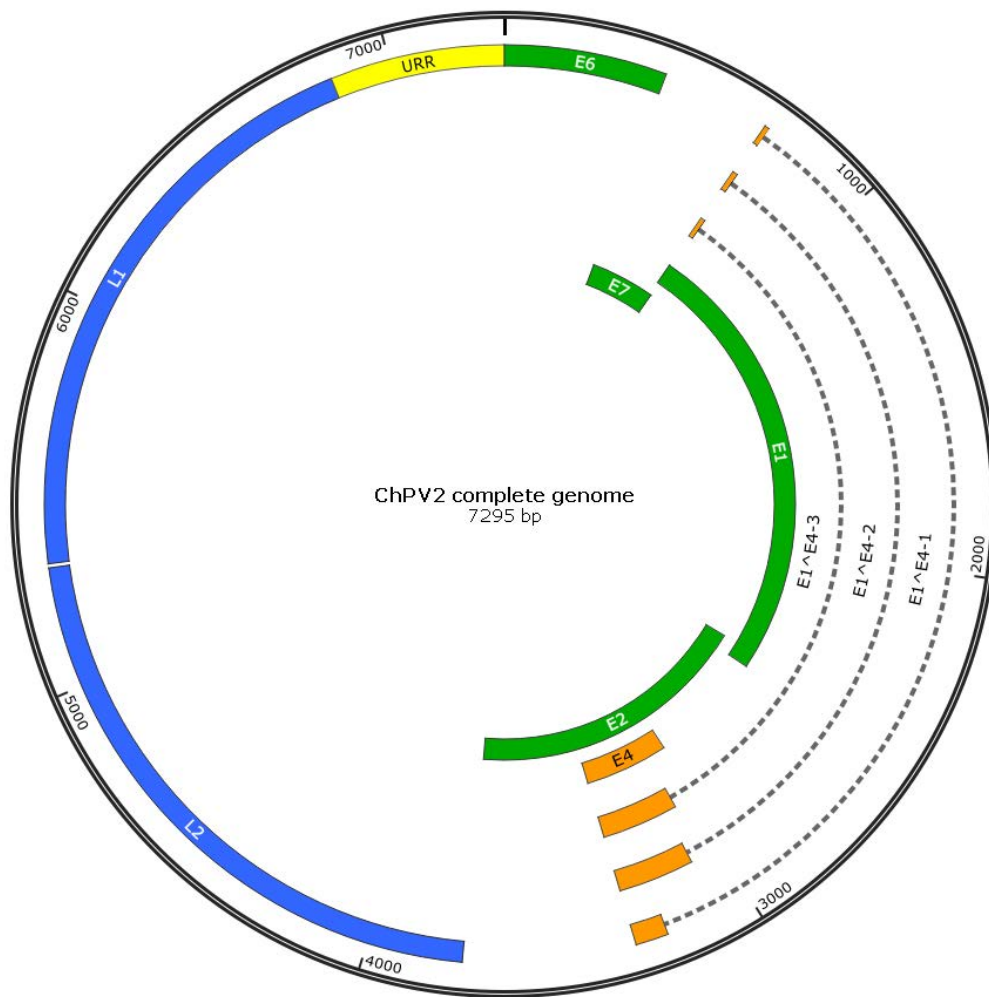

**Figure S1:** Genome organization of ChPV2, Upstream regulatory region, yellow; early genes, green late genes, blue, potential E4 gene and potential E1<sup>E4</sup> splicing patterns, ochre

**Table S1:** Genome organization of ChPV2 presenting orf positions, orf length, GC content and amino Acid content of encoded potential proteins and their molecular weight

| orf                 | nt positions             | bp   | GC content | aa   | protein molecular weight kDa |
|---------------------|--------------------------|------|------------|------|------------------------------|
| E6                  | 1..417                   | 417  | 41%        | 138  | 16.02                        |
| E7                  | 414..710                 | 297  | 51%        | 98   | 10.81                        |
| E1 <sup>E4</sup> -1 | 700.. 712 and 3052..3311 | 237  | 59%        | 78   | 10.24                        |
| E1 <sup>E4</sup> -2 | 700.. 712 and 3088..3311 | 273  | 58%        | 90   | 8.98                         |
| E1 <sup>E4</sup> -3 | 700.. 712 and 3088..3311 | 99   | 59%        | 32   | 8.12                         |
| E4                  | 2976..3311               | 336  | 55%        | 111  | 12.69                        |
| E1                  | 700..2508                | 1809 | 41%        | 602  | 68.53                        |
| E2                  | 2450..3742               | 1293 | 48%        | 430  | 48.62                        |
| L2                  | 3755..5311               | 1557 | 44%        | 518  | 56.74                        |
| L1                  | 5322..6848               | 1527 | 42%        | 508  | 57.48                        |
| URR                 | 6849..7295               | 447  | 39%        | n.a. | n.a.                         |

**Table S2:** Nucleotide (nt) identity of ChPV2 genes with the respective genes of closely related PV types

| % nt identity | BPV3 XiPV | BPV4 XiPV | BPV6 XiPV | BPV9 XiPV | BPV10 XiPV | BPV11 XiPV | BPV12 XiPV | BPV15 XiPV | BPV17 XiPV | BPV20 XiPV | BPV23 XiPV | BPV24 XiPV | CePV2 XiPV | RtPV2 XiPV | ChPV1 PhiPV | RtiPV1 ? |
|---------------|-----------|-----------|-----------|-----------|------------|------------|------------|------------|------------|------------|------------|------------|------------|------------|-------------|----------|
| <b>E6</b>     | n.a.      | n.a.      | n.a.      | n.a.      | n.a.       | n.a.       | n.a.       | n.a.       | 45.4       | 62.1       | n.a.       | n.a.       | 52.0       | 62.8       | 45.4        | 38.3     |
| <b>E7</b>     | 61.5      | 60.2      | 60.6      | 55.2      | 65.3       | 60.2       | 53.4       | 58.3       | 47.8       | 56.4       | 59.5       | 58.1       | 45.5       | 56.4       | 43.8        | 39.9     |
| <b>E1</b>     | 73.0      | 71.5      | 72.1      | 73.1      | 70.6       | 71.7       | 66.0       | 70.4       | 59.5       | 66.3       | 73.3       | 69.7       | 64.6       | 68.4       | 51.6        | 55.7     |
| <b>E2</b>     | 59.4      | 59.1      | 58.4      | 59.2      | 62.5       | 58.5       | 48.4       | 59.4       | 49.5       | 54.7       | 58.9       | 58.5       | 53.9       | 55.1       | 36.2        | 36.2     |
| <b>L2</b>     | 65.3      | 64.8      | 64.2      | 65.6      | 66.1       | 66.9       | 60.2       | 64.8       | 49.3       | 57.2       | 63.7       | 66.1       | 56.9       | 58.0       | 44.3        | 47.4     |
| <b>L1</b>     | 69.7      | 70.1      | 72.0      | 70.2      | 71.3       | 70.3       | 66.5       | 67.5       | 58.3       | 64.7       | 69.2       | 69.6       | 63.8       | 67.5       | 55.3        | 59.9     |

**Table S3:** Amino acid (aa) identity of ChPV2 genes with the respective genes of closely related PV types

| % aa identity | BPV3 XiPV | BPV4 XiPV | BPV6 XiPV | BPV9 XiPV | BPV10 XiPV | BPV11 XiPV | BPV12 XiPV | BPV15 XiPV | BPV17 XiPV | BPV20 XiPV | BPV23 XiPV | BPV24 XiPV | CePV2 XiPV | RtPV2 XiPV | ChPV1 PhiPV | RtiPV1 ? |
|---------------|-----------|-----------|-----------|-----------|------------|------------|------------|------------|------------|------------|------------|------------|------------|------------|-------------|----------|
| <b>E6</b>     | n.a.      | n.a.      | n.a.      | n.a.      | n.a.       | n.a.       | n.a.       | n.a.       | 36.9       | 57.5       | n.a.       | n.a.       | 45.8       | 53.9       | 30.7        | 28.9     |
| <b>E7</b>     | 50.0      | 47.9      | 52.5      | 48.4      | 56.1       | 48.9       | 45.9       | 49.0       | 38.6       | 46.9       | 47.9       | 44.8       | 38.6       | 43.8       | 39.7        | 31.6     |
| <b>E1</b>     | 72.6      | 70.7      | 72.7      | 71.8      | 72.9       | 69.8       | 60.0       | 70.3       | 52.9       | 63.9       | 71.2       | 69.7       | 59.1       | 65.7       | 44.1        | 47.9     |
| <b>E2</b>     | 55.4      | 54.4      | 52.8      | 55.0      | 59.7       | 53.3       | 40.7       | 53.5       | 41.0       | 46.4       | 54.5       | 52.9       | 43.2       | 47.4       | 28.3        | 27.8     |
| <b>L2</b>     | 66.4      | 64.9      | 63.4      | 65.9      | 70.3       | 67.9       | 60.4       | 66.0       | 47.2       | 59.3       | 65.3       | 65.8       | 57.3       | 58.9       | 40.1        | 42.5     |
| <b>L1</b>     | 72.9      | 70.3      | 75.2      | 75.0      | 74.3       | 71.4       | 68.6       | 72.0       | 53.2       | 65.6       | 74.4       | 69.2       | 64.0       | 68.4       | 52.5        | 54.6     |

**Table S4:** Potential motifs and domains identified in amino acid sequences of ChPV2 proteins

| protein | domain/motif/site           | consensus sequence                                       | aa position |
|---------|-----------------------------|----------------------------------------------------------|-------------|
| E6      | zinc binding motif          | C-X <sub>2</sub> -C-X <sub>28</sub> -C-X <sub>2</sub> -C | 28-64       |
| E6      | zinc binding motif          | C-X <sub>2</sub> -C-X <sub>28</sub> -C-X <sub>2</sub> -C | 99-135      |
| E7      | pRB binding motif           | LXCXE                                                    | 24-28       |
| E7      | CkII phosphorylation site   | TLPD                                                     | 7-10        |
| E7      | zinc binding motif          | C-X <sub>2</sub> -C-X <sub>28</sub> -C-X <sub>2</sub> -C | 47-83       |
| E1      | SF3 helicase 1 domain       | n.a.                                                     | 404-554     |
| E2      | DNA binding helix           | GCANTLKCFRRRTSHSHPHK                                     | 356-374     |
| L2      | nuclear localization signal | RKFKRRTK                                                 | 509-16      |
| L1      | nuclear localization signal | RAPKRKRK                                                 | 499-506     |

**Table S5:** Potential regulatory elements identified throughout the ChPV2 genome, elements marked with a \* have a mismatch to the published consensus sequence for the respective element

| element                 | sequence                | nt position |
|-------------------------|-------------------------|-------------|
| E2 binding site         | ACC-N <sub>6</sub> -GGT | 7164.. 7175 |
| E1 binding site         | GTAGTTGTTGTTAACAACAAT   | 7201.. 7218 |
| E2 binding site         | ACC-N <sub>6</sub> -GGT | 7242.. 7253 |
| E2 binding site         | ACC-N <sub>6</sub> -GGT | 7258.. 7269 |
| TATA Box early promoter | TATAAA                  | 7273.. 7277 |
| E2 binding site *       | ACT-N <sub>6</sub> -GGT | 455.. 466   |
| E2 binding site *       | ACC-N <sub>6</sub> -GTG | 481..492    |
| TATA Box late promoter  | TATAA                   | 555-559     |
| early pA                | AATAAA                  | 749.. 3754  |
| E2 binding site         | ACC-N <sub>6</sub> -GGT | 6789.. 6796 |
| late pA                 | AATAAA                  | 6920.. 6925 |

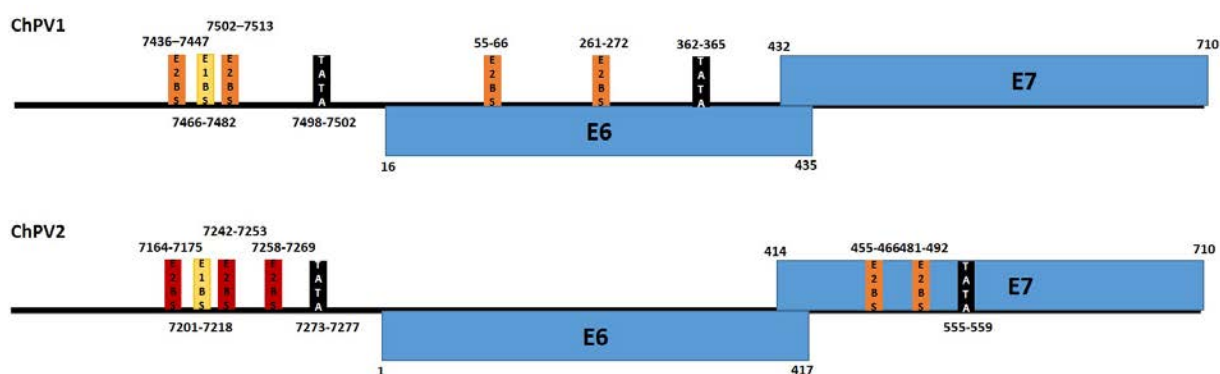

**Figure S2:** presence and position of regulatory elements within URR and early gene region of ChPV1 and ChPV2, E1- binding sites (E1BS) are marked by yellow boxes, E2- binding sites (E2BS) perfectly matching the E2BS consensus sequence are marked by red boxes, E2BS with 1 nucleotide mismatch to the E2BS consensus sequence are marked in orange. nucleotide positions of early genes and regulatory elements are depicted below or above the respective element.

**Table S6:** List of PV genomes collected from PaVE (pave.niaid.nih.gov) plus ChPV2

| <b>PV_abbreviation</b> | <b>PV_full_name</b>                     | <b>PV species</b> | <b>PaVE_ID</b> |
|------------------------|-----------------------------------------|-------------------|----------------|
| AaPV1                  | Alces alces Papillomavirus 1            | Delta_1           | AaPV1REF       |
| AgPV1                  | Alouatta guariba Papillomavirus 1       | Dyoomikron        | AgPV1REF       |
| AmPV1                  | Ailuropoda melanoleuca Papillomavirus 1 | Omega             | AmPV1REF       |
| AmPV2                  | Ailuropoda melanoleuca Papillomavirus 2 | Omega             | AmPV2REF       |
| AmPV3                  | Ailuropoda Melanoleuca Papillomavirus 3 | Dyonu             | AmPV3REF       |
| AmPV4                  | Ailuropoda melanoleuca Papillomavirus 4 | Lambda            | AmPV4REF       |
| AsPV1                  | Apodemus sylvaticus Papillomavirus 1    | Pi_2              | AsPV1REF       |
| BgPV1                  | Bos grunniens papillomavirus 1          | Delta_4           | BgPV1REF       |
| BpPV1                  | Bettongia penicillata papillomavirus 1  | Dyolambda_1       | BpPV1REF       |
| BPV1                   | Bos taurus Papillomavirus 1             | Delta_4           | BPV1REF        |
| BPV10                  | Bos taurus Papillomavirus 10            | Xi_1              | BPV10REF       |
| BPV11                  | Bos taurus Papillomavirus 11            | Xi_1              | BPV11REF       |
| BPV12                  | Bos taurus Papillomavirus 12            | Xi_2              | BPV12REF       |
| BPV13                  | Bos taurus Papillomavirus 13            | Delta_4           | BPV13REF       |
| BPV14                  | Bovine papillomavirus 14                | Delta_4           | BPV14REF       |
| BPV15                  | Bovine papillomavirus 15                | Xi_1              | BPV15REF       |
| BPV16                  | Bovine Papillomavirus 16                | Dyokappa          | BPV16REF       |
| BPV17                  | Bovine Papillomavirus 17                | Xi                | BPV17REF       |
| BPV18                  | Bovine Papillomavirus 18                | Dyokappa          | BPV18REF       |
| BPV19                  | Bovine Papillomavirus 19                | Unclassified      | BPV19REF       |
| BPV2                   | Bos taurus Papillomavirus 2             | Delta_4           | BPV2REF        |
| BPV20                  | Bovine Papillomavirus 20                | Xi                | BPV20REF       |
| BPV21                  | Bovine Papillomavirus 21                | Unclassified      | BPV21REF       |
| BPV22                  | Bos taurus Papillomavirus 22            | Dyokappa          | BPV22REF       |
| BPV23                  | Bos taurus Papillomavirus 23            | Xi                | BPV23REF       |
| BPV24                  | Bos Taurus Papillomavirus 24            | Xi                | BPV24REF       |
| BPV3                   | Bos taurus Papillomavirus 3             | Xi_1              | BPV3REF        |
| BPV4                   | Bos taurus Papillomavirus 4             | Xi_1              | BPV4REF        |
| BPV5                   | Bos taurus Papillomavirus 5             | Epsilon_1         | BPV5REF        |
| BPV6                   | Bos taurus Papillomavirus 6             | Xi_1              | BPV6REF        |
| BPV7                   | Bos taurus Papillomavirus 7             | Dyoxi_1           | BPV7REF        |
| BPV8                   | Bos taurus Papillomavirus 8             | Epsilon_1         | BPV8REF        |
| BPV9                   | Bos taurus Papillomavirus 9             | Xi_1              | BPV9REF        |
| CcanPV1                | Castor canadensis papillomavirus 1      | Dyosigma_1        | CcanPV1REF     |
| CcaPV1                 | Capreolus capreolus Papillomavirus 1    | Delta_5           | CcaPV1REF      |
| CcPV1                  | Caretta caretta Papillomavirus 1        | Dyozeta_1         | CcPV1REF       |
| CcrPV1                 | Crocota crocuta papillomavirus 1        | Lambda_5          | CcrPV1REF      |
| CdPV1                  | Camelus dromedarius papillomavirus 1    | Delta_6           | CdPV1REF       |
| CdPV2                  | Camelus dromedarius papillomavirus 2    | Delta_6           | CdPV2REF       |
| CePV1                  | Cervus elaphus Papillomavirus 2         | Epsilon           | CePV1REF       |
| CePV2                  | Cervus elaphus Papillomavirus 1         | Xi                | CePV2REF       |
| CgPV1                  | Colobus guereza Papillomavirus 1        | Alpha_14          | CgPV1REF       |
| CgPV2                  | Colobus guereza Papillomavirus 2        | Beta_1            | CgPV2REF       |
| ChPV1                  | Capra hircus Papillomavirus 1           | Phi_1             | ChPV1REF       |
| ChPV2                  | Capra hircus Papillomavirus 2           | Unclassified      | ChPV2REF       |

|        |                                          |                |           |
|--------|------------------------------------------|----------------|-----------|
| CmPV1  | Chelonia mydas Papillomavirus 1          | Dyozeta_1      | CmPV1REF  |
| CPV1   | Canis familiaris oral Papillomavirus     | Lambda_2       | CPV1REF   |
| CPV10  | Canis familiaris papillomavirus 10       | Chi_3          | CPV10REF  |
| CPV11  | Canis familiaris papillomavirus 11       | Chi_1          | CPV11REF  |
| CPV12  | Canis familiaris papillomavirus 12       | Chi_1          | CPV12REF  |
| CPV13  | Canis familiaris papillomavirus 13       | Tau_2          | CPV13REF  |
| CPV14  | Canis familiaris papillomavirus 14       | Chi_3          | CPV14REF  |
| CPV15  | Canis familiaris papillomavirus 15       | Chi_3          | CPV15REF  |
| CPV16  | Canine papillomavirus 16                 | Chi_2          | CPV16REF  |
| CPV17  | Canine Papillomavirus 17                 | Tau            | CPV17REF  |
| CPV18  | Canine Papillomavirus 18                 | Chi            | CPV18REF  |
| CPV19  | Canine Papillomavirus 19                 | Tau            | CPV19REF  |
| CPV2   | Canis familiaris Papillomavirus 2        | Tau_1          | CPV2REF   |
| CPV20  | Canine Papillomavirus 20                 | Chi            | CPV20REF  |
| CPV3   | Canis familiaris Papillomavirus 3        | Chi_1          | CPV3REF   |
| CPV4   | Canis familiaris Papillomavirus 4        | Chi_2          | CPV4REF   |
| CPV5   | Canis familiaris Papillomavirus 5        | Chi_1          | CPV5REF   |
| CPV6   | Canis familiaris Papillomavirus 6        | Lambda_3       | CPV6REF   |
| CPV7   | Canis familiaris Papillomavirus 7        | Tau_1          | CPV7REF   |
| CPV8   | Canis familiaris papillomavirus 8        | Chi_3          | CPV8REF   |
| CPV9   | Canis familiaris papillomavirus 9        | Chi_1          | CPV9REF   |
| DdPV1  | Delphinus delphis papillomavirus         | Upsilon_1      | DdPV1REF  |
| EaPV1  | Equus asinus papillomavirus              | Dyochi_1       | EaPV1REF  |
| EcPV1  | Equus caballus Papillomavirus 1          | Zeta_1         | EcPV1REF  |
| EcPV2  | Equus caballus Papillomavirus 2          | Dyoiota_1      | EcPV2REF  |
| EcPV3  | Equus caballus papillomavirus 3          | Dyorho_1       | EcPV3REF  |
| EcPV4  | Equus caballus papillomavirus 4          | Dyoiota_2      | EcPV4REF  |
| EcPV5  | Equus caballus papillomavirus 5          | Dyoiota_2      | EcPV5REF  |
| EcPV6  | Equus caballus papillomavirus 6          | Dyorho_1       | EcPV6REF  |
| EcPV7  | Equus caballus papillomavirus 7          | Dyorho_1       | EcPV7REF  |
| EcPV8  | Equus caballus Papillomavirus 8          | Unclassified   | EcPV8REF  |
| EdPV1  | Erethizon dorsatum Papillomavirus 1      | Sigma_1        | EdPV1REF  |
| EePV1  | Erinaceus europaeus Papillomavirus 1     | Dyoeta_1       | EePV1REF  |
| EhPV1  | Eidolon helvum papillomavirus 1          | Dyoudypsilon_1 | EhPV1REF  |
| EhPV2  | Eidolon helvum Papillomavirus 2          | Psi            | EhPV2REF  |
| EhPV3  | Eidolon helvum Papillomavirus 3          | Psi            | EhPV3REF  |
| EIPV1  | Enhydra lutris papillomavirus 1          | Lambda_4       | EIPV1REF  |
| EsPV1  | Eptesicus serotinus papillomavirus 1     | Dyopsi_1       | EsPV1REF  |
| EsPV2  | Eptesicus serotinus papillomavirus 2     | Dyomega_1      | EsPV2REF  |
| EsPV3  | Eptesicus serotinus papillomavirus 3     | Dyopsi_1       | EsPV3REF  |
| FcaPV1 | Felis domesticus Papillomavirus 1        | Lambda_1       | FcaPV1REF |
| FcaPV2 | Felis domesticus Papillomavirus 2        | Dytheta_1      | FcaPV2REF |
| FcaPV3 | Felis catus papillomavirus 3             | Tau_3          | FcaPV3REF |
| FcaPV4 | Felis catus papillomavirus 4             | Tau_3          | FcaPV4REF |
| FcaPV5 | Felis catus Papillomavirus 5             | Tau            | FcaPV5REF |
| FcPV1  | Fringilla coelebs Papillomavirus         | Eta_1          | FcPV1REF  |
| FgPV1  | Fulmarus glacialis papillomavirus 1      | Treiseta       | FgPV1REF  |
| FIPV1  | Francolinus leucoscepus Papillomavirus 1 | Dyoudypsilon_1 | FIPV1REF  |

|        |                                         |          |           |
|--------|-----------------------------------------|----------|-----------|
| GcPV1  | Giraffa camelopardalis Papillomavirus 1 | Delta    | GcPV1REF  |
| HPV1   | Human papillomavirus 1                  | Mu_1     | HPV1REF   |
| HPV10  | Human papillomavirus 10                 | Alpha_2  | HPV10REF  |
| HPV100 | Human papillomavirus 100                | Beta_2   | HPV100REF |
| HPV101 | Human papillomavirus 101                | Gamma_6  | HPV101REF |
| HPV102 | Human papillomavirus 102                | Alpha_3  | HPV102REF |
| HPV103 | Human papillomavirus 103                | Gamma_6  | HPV103REF |
| HPV104 | Human papillomavirus 104                | Beta_2   | HPV104REF |
| HPV105 | Human papillomavirus 105                | Beta_1   | HPV105REF |
| HPV106 | Human papillomavirus 106                | Alpha_14 | HPV106REF |
| HPV107 | Human papillomavirus 107                | Beta_2   | HPV107REF |
| HPV108 | Human Papillomavirus 108                | Gamma_6  | HPV108REF |
| HPV109 | Human papillomavirus 109                | Gamma_7  | HPV109REF |
| HPV11  | Human papillomavirus 11                 | Alpha_10 | HPV11REF  |
| HPV110 | Human papillomavirus 110                | Beta_2   | HPV110REF |
| HPV111 | Human papillomavirus 111                | Beta_2   | HPV111REF |
| HPV112 | Human papillomavirus 112                | Gamma_8  | HPV112REF |
| HPV113 | Human papillomavirus 113                | Beta_2   | HPV113REF |
| HPV114 | Human papillomavirus 114                | Alpha_3  | HPV114REF |
| HPV115 | Human papillomavirus 115                | Beta_3   | HPV115REF |
| HPV116 | Human papillomavirus 116                | Gamma_9  | HPV116REF |
| HPV117 | Human papillomavirus 117                | Alpha_2  | HPV117REF |
| HPV118 | Human papillomavirus 118                | Beta_1   | HPV118REF |
| HPV119 | Human papillomavirus 119                | Gamma_8  | HPV119REF |
| HPV12  | Human papillomavirus 12                 | Beta_1   | HPV12REF  |
| HPV120 | Human papillomavirus 120                | Beta_2   | HPV120REF |
| HPV121 | Human papillomavirus 121                | Gamma_10 | HPV121REF |
| HPV122 | Human papillomavirus 122                | Beta_2   | HPV122REF |
| HPV123 | Human papillomavirus 123                | Gamma_7  | HPV123REF |
| HPV124 | Human papillomavirus 124                | Beta_1   | HPV124REF |
| HPV125 | Human papillomavirus 125                | Alpha_2  | HPV125REF |
| HPV126 | Human papillomavirus 126                | Gamma_11 | HPV126REF |
| HPV127 | Human papillomavirus 127                | Gamma_12 | HPV127REF |
| HPV128 | Human papillomavirus 128                | Gamma_13 | HPV128REF |
| HPV129 | Human papillomavirus 129                | Gamma_9  | HPV129REF |
| HPV13  | Human papillomavirus 13                 | Alpha_10 | HPV13REF  |
| HPV130 | Human papillomavirus 130                | Gamma_10 | HPV130REF |
| HPV131 | Human papillomavirus 131                | Gamma_14 | HPV131REF |
| HPV132 | Human papillomavirus 132                | Gamma_12 | HPV132REF |
| HPV133 | Human papillomavirus 133                | Gamma_10 | HPV133REF |
| HPV134 | Human papillomavirus 134                | Gamma_7  | HPV134REF |
| HPV135 | Human papillomavirus 135                | Gamma_15 | HPV135REF |
| HPV136 | Human papillomavirus 136                | Gamma_11 | HPV136REF |
| HPV137 | Human papillomavirus 137                | Gamma_16 | HPV137REF |
| HPV138 | Human papillomavirus 138                | Gamma_7  | HPV138REF |
| HPV139 | Human papillomavirus 139                | Gamma_7  | HPV139REF |
| HPV14  | Human papillomavirus 14                 | Beta_1   | HPV14REF  |
| HPV140 | Human papillomavirus 140                | Gamma_11 | HPV140REF |

|        |                               |          |           |
|--------|-------------------------------|----------|-----------|
| HPV141 | Human papillomavirus 141      | Gamma_11 | HPV141REF |
| HPV142 | Human papillomavirus 142      | Gamma_10 | HPV142REF |
| HPV143 | Human papillomavirus 143      | Beta_1   | HPV143REF |
| HPV144 | Human papillomavirus 144      | Gamma_17 | HPV144REF |
| HPV145 | Human papillomavirus 145      | Beta_2   | HPV145REF |
| HPV146 | Human papillomavirus 146      | Gamma_15 | HPV146REF |
| HPV147 | Human papillomavirus 147      | Gamma_8  | HPV147REF |
| HPV148 | Human papillomavirus 148      | Gamma_12 | HPV148REF |
| HPV149 | Human papillomavirus 149      | Gamma_7  | HPV149REF |
| HPV15  | Human papillomavirus 15       | Beta_2   | HPV15REF  |
| HPV150 | Human papillomavirus 150      | Beta_5   | HPV150REF |
| HPV151 | Human papillomavirus 151      | Beta_2   | HPV151REF |
| HPV152 | Human papillomavirus 152      | Beta_1   | HPV152REF |
| HPV153 | Human papillomavirus 153      | Gamma_13 | HPV153REF |
| HPV154 | Human papillomavirus 154      | Gamma_11 | HPV154REF |
| HPV155 | Human papillomavirus 155      | Gamma_7  | HPV155REF |
| HPV156 | Human papillomavirus 156      | Gamma_18 | HPV156REF |
| HPV157 | Human Papillomavirus 157      | Gamma    | HPV157REF |
| HPV158 | Human Papillomavirus 158      | Gamma    | HPV158REF |
| HPV159 | Human papillomavirus 159      | Beta_2   | HPV159REF |
| HPV16  | Human papillomavirus 16       | Alpha_9  | HPV16REF  |
| HPV160 | Human papillomavirus 160      | Alpha_2  | HPV160REF |
| HPV161 | Human papillomavirus 161      | Gamma_19 | HPV161REF |
| HPV162 | Human papillomavirus 162      | Gamma_19 | HPV162REF |
| HPV163 | Human papillomavirus 163      | Gamma_20 | HPV163REF |
| HPV164 | Human papillomavirus 164      | Gamma_8  | HPV164REF |
| HPV165 | Human Papillomavirus 165      | Gamma_12 | HPV165REF |
| HPV166 | Human papillomavirus 166      | Gamma_19 | HPV166REF |
| HPV167 | Human papillomavirus 167      | Gamma_21 | HPV167REF |
| HPV168 | Human papillomavirus 168      | Gamma_8  | HPV168REF |
| HPV169 | Human papillomavirus 169      | Gamma_11 | HPV169REF |
| HPV17  | Human papillomavirus 17       | Beta_2   | HPV17REF  |
| HPV170 | Human papillomavirus 170      | Gamma_7  | HPV170REF |
| HPV171 | Human papillomavirus 171      | Gamma_11 | HPV171REF |
| HPV172 | Human papillomavirus 172      | Gamma_22 | HPV172REF |
| HPV173 | Human papillomavirus 173      | Gamma_1  | HPV173REF |
| HPV174 | Human papillomavirus 174      | Beta_2   | HPV174REF |
| HPV175 | Human papillomavirus 175      | Gamma_23 | HPV175REF |
| HPV178 | Human Papillomavirus 178      | Gamma_24 | HPV178REF |
| HPV179 | Human papillomavirus type 179 | Gamma_15 | HPV179REF |
| HPV18  | Human papillomavirus 18       | Alpha_7  | HPV18REF  |
| HPV180 | Human papillomavirus 180      | Gamma_10 | HPV180REF |
| HPV184 | Human papillomavirus type 184 | Gamma_25 | HPV184REF |
| HPV187 | Human Papillomavirus 187      | Gamma_26 | HPV187REF |
| HPV19  | Human papillomavirus 19       | Beta_1   | HPV19REF  |
| HPV197 | Human papillomavirus type 197 | Gamma_24 | HPV197REF |
| HPV199 | Human papillomavirus type 199 | Gamma_12 | HPV199REF |
| HPV2   | Human papillomavirus 2        | Alpha_4  | HPV2REF   |

|        |                               |          |           |
|--------|-------------------------------|----------|-----------|
| HPV20  | Human papillomavirus 20       | Beta_1   | HPV20REF  |
| HPV200 | Human papillomavirus 200      | Gamma_2  | HPV200REF |
| HPV201 | Human papillomavirus 201      | Gamma_27 | HPV201REF |
| HPV202 | Human papillomavirus 202      | Gamma_11 | HPV202REF |
| HPV203 | Human Papillomavirus 203      | Gamma    | HPV203REF |
| HPV204 | Human papillomavirus 204      | Mu_3     | HPV204REF |
| HPV205 | Human Papillomavirus 205      | Gamma    | HPV205REF |
| HPV209 | Human Papillomavirus 209      | Beta     | HPV209REF |
| HPV21  | Human papillomavirus 21       | Beta_1   | HPV21REF  |
| HPV211 | Human Papillomavirus mCT02_8  | Gamma    | HPV211REF |
| HPV212 | Human Papillomavirus mCT023_1 | Gamma    | HPV212REF |
| HPV213 | Human Papillomavirus 213      | Gamma    | HPV213REF |
| HPV214 | Human Papillomavirus 214      | Gamma    | HPV214REF |
| HPV215 | Human Papillomavirus 215      | Gamma    | HPV215REF |
| HPV216 | Human Papillomavirus 216      | Gamma    | HPV216REF |
| HPV22  | Human papillomavirus 22       | Beta_2   | HPV22REF  |
| HPV223 | Human Papillomavirus 223      | Gamma    | HPV223REF |
| HPV225 | Human Papillomavirus 225      | Gamma    | HPV225REF |
| HPV23  | Human papillomavirus 23       | Beta_2   | HPV23REF  |
| HPV24  | Human papillomavirus 24       | Beta_1   | HPV24REF  |
| HPV25  | Human papillomavirus 25       | Beta_1   | HPV25REF  |
| HPV26  | Human papillomavirus 26       | Alpha_5  | HPV26REF  |
| HPV27  | Human papillomavirus 27       | Alpha_4  | HPV27REF  |
| HPV28  | Human papillomavirus 28       | Alpha_2  | HPV28REF  |
| HPV29  | Human papillomavirus 29       | Alpha_2  | HPV29REF  |
| HPV3   | Human papillomavirus 3        | Alpha_2  | HPV3REF   |
| HPV30  | Human papillomavirus 30       | Alpha_6  | HPV30REF  |
| HPV31  | Human papillomavirus 31       | Alpha_9  | HPV31REF  |
| HPV32  | Human papillomavirus 32       | Alpha_1  | HPV32REF  |
| HPV33  | Human papillomavirus 33       | Alpha_9  | HPV33REF  |
| HPV34  | Human papillomavirus 34       | Alpha_11 | HPV34REF  |
| HPV35  | Human papillomavirus 35       | Alpha_9  | HPV35REF  |
| HPV36  | Human papillomavirus 36       | Beta_1   | HPV36REF  |
| HPV37  | Human papillomavirus 37       | Beta_2   | HPV37REF  |
| HPV38  | Human papillomavirus 38       | Beta_2   | HPV38REF  |
| HPV39  | Human papillomavirus 39       | Alpha_7  | HPV39REF  |
| HPV4   | Human papillomavirus 4        | Gamma_1  | HPV4REF   |
| HPV40  | Human papillomavirus 40       | Alpha_8  | HPV40REF  |
| HPV41  | Human papillomavirus 41       | Nu_1     | HPV41REF  |
| HPV42  | Human papillomavirus 42       | Alpha_1  | HPV42REF  |
| HPV43  | Human papillomavirus 43       | Alpha_8  | HPV43REF  |
| HPV44  | Human papillomavirus 44       | Alpha_10 | HPV44REF  |
| HPV45  | Human papillomavirus 45       | Alpha_7  | HPV45REF  |
| HPV47  | Human papillomavirus 47       | Beta_1   | HPV47REF  |
| HPV48  | Human papillomavirus 48       | Gamma_2  | HPV48REF  |
| HPV49  | Human papillomavirus 49       | Beta_3   | HPV49REF  |
| HPV5   | Human Papillomavirus 5        | Beta_1   | HPV5REF   |
| HPV50  | Human papillomavirus 50       | Gamma_3  | HPV50REF  |



|       |                         |          |          |
|-------|-------------------------|----------|----------|
| HPV51 | Human papillomavirus 51 | Alpha_5  | HPV51REF |
| HPV52 | Human papillomavirus 52 | Alpha_9  | HPV52REF |
| HPV53 | Human papillomavirus 53 | Alpha_6  | HPV53REF |
| HPV54 | Human papillomavirus 54 | Alpha_13 | HPV54REF |
| HPV56 | Human papillomavirus 56 | Alpha_6  | HPV56REF |
| HPV57 | Human papillomavirus 57 | Alpha_4  | HPV57REF |
| HPV58 | Human papillomavirus 58 | Alpha_9  | HPV58REF |
| HPV59 | Human papillomavirus 59 | Alpha_7  | HPV59REF |
| HPV6  | Human papillomavirus 6  | Alpha_10 | HPV6REF  |
| HPV60 | Human papillomavirus 60 | Gamma_4  | HPV60REF |
| HPV61 | Human papillomavirus 61 | Alpha_3  | HPV61REF |
| HPV62 | Human papillomavirus 62 | Alpha_3  | HPV62REF |
| HPV63 | Human papillomavirus 63 | Mu_2     | HPV63REF |
| HPV65 | Human papillomavirus 65 | Gamma_1  | HPV65REF |
| HPV66 | Human papillomavirus 66 | Alpha_6  | HPV66REF |
| HPV67 | Human papillomavirus 67 | Alpha_9  | HPV67REF |
| HPV68 | Human papillomavirus 68 | Alpha_7  | HPV68REF |
| HPV69 | Human papillomavirus 69 | Alpha_5  | HPV69REF |
| HPV7  | Human papillomavirus 7  | Alpha_8  | HPV7REF  |
| HPV70 | Human papillomavirus 70 | Alpha_7  | HPV70REF |
| HPV71 | Human papillomavirus 71 | Alpha_14 | HPV71REF |
| HPV72 | Human papillomavirus 72 | Alpha_3  | HPV72REF |
| HPV73 | Human papillomavirus 73 | Alpha_11 | HPV73REF |
| HPV74 | Human papillomavirus 74 | Alpha_10 | HPV74REF |
| HPV75 | Human papillomavirus 75 | Beta_3   | HPV75REF |
| HPV76 | Human papillomavirus 76 | Beta_3   | HPV76REF |
| HPV77 | Human papillomavirus 77 | Alpha_2  | HPV77REF |
| HPV78 | Human papillomavirus 78 | Alpha_2  | HPV78REF |
| HPV8  | Human papillomavirus 8  | Beta_1   | HPV8REF  |
| HPV80 | Human papillomavirus 80 | Beta_2   | HPV80REF |
| HPV81 | Human papillomavirus 81 | Alpha_3  | HPV81REF |
| HPV82 | Human papillomavirus 82 | Alpha_5  | HPV82REF |
| HPV83 | Human papillomavirus 83 | Alpha_3  | HPV83REF |
| HPV84 | Human papillomavirus 84 | Alpha_3  | HPV84REF |
| HPV85 | Human papillomavirus 85 | Alpha_7  | HPV85REF |
| HPV86 | Human papillomavirus 86 | Alpha_3  | HPV86REF |
| HPV87 | Human papillomavirus 87 | Alpha_3  | HPV87REF |
| HPV88 | Human papillomavirus 88 | Gamma_5  | HPV88REF |
| HPV89 | Human papillomavirus 89 | Alpha_3  | HPV89REF |
| HPV9  | Human papillomavirus 9  | Beta_2   | HPV9REF  |
| HPV90 | Human papillomavirus 90 | Alpha_14 | HPV90REF |
| HPV91 | Human papillomavirus 91 | Alpha_8  | HPV91REF |
| HPV92 | Human papillomavirus 92 | Beta_4   | HPV92REF |
| HPV93 | Human papillomavirus 93 | Beta_1   | HPV93REF |
| HPV94 | Human papillomavirus 94 | Alpha_2  | HPV94REF |
| HPV95 | Human papillomavirus 95 | Gamma_1  | HPV95REF |
| HPV96 | Human papillomavirus 96 | Beta_5   | HPV96REF |
| HPV97 | Human papillomavirus 97 | Alpha_7  | HPV97REF |

|        |                                           |                |           |
|--------|-------------------------------------------|----------------|-----------|
| HPV98  | Human papillomavirus 98                   | Beta_1         | HPV98REF  |
| HPV99  | Human papillomavirus 99                   | Beta_1         | HPV99REF  |
| LrPV1  | Lynx rufus Papillomavirus 1               | Lambda_1       | LrPV1REF  |
| LwPV1  | Leptonychotes weddellii Papillomavirus 1  | Unclassified   | LwPV1REF  |
| LwPV2  | Leptonychotes weddellii Papillomavirus 2  | Unclassified   | LwPV2REF  |
| LwPV3  | Leptonychotes weddellii Papillomavirus 3  | Dyonu          | LwPV3REF  |
| LwPV4  | Leptonychotes weddellii Papillomavirus 4  | Dyotheta       | LwPV4REF  |
| LwPV5  | Leptonychotes weddellii Papillomavirus 5  | Tau            | LwPV5REF  |
| LwPV6  | Leptonychotes weddellii Papillomavirus 6  | Omega          | LwPV6REF  |
| LwPV7  | Leptonychotes weddellii Papillomavirus 7  | Omega          | LwPV7REF  |
| MaPV1  | Mesocricetus auratus Papillomavirus 1     | Pi_2           | MaPV1REF  |
| McPV2  | Mastomys coucha Papillomavirus 2          | Pi_2           | McPV2REF  |
| MfPV1  | Macaca fascicularis Papillomavirus 1      | Beta_1         | MfPV1REF  |
| MfPV10 | Macaca fascicularis Papillomavirus 10     | Alpha_12       | MfPV10REF |
| MfPV11 | Macaca fascicularis Papillomavirus 11     | Alpha_12       | MfPV11REF |
| MfPV2  | Macaca fascicularis Papillomavirus 2      | Beta_6         | MfPV2REF  |
| MfPV3  | Macaca fascicularis Papillomavirus 3      | Alpha_12       | MfPV3REF  |
| MfPV4  | Macaca fascicularis Papillomavirus 4      | Alpha_12       | MfPV4REF  |
| MfPV5  | Macaca fascicularis Papillomavirus 5      | Alpha_12       | MfPV5REF  |
| MfPV6  | Macaca fascicularis Papillomavirus 6      | Alpha_12       | MfPV6REF  |
| MfPV7  | Macaca fascicularis Papillomavirus 7      | Alpha_12       | MfPV7REF  |
| MfPV8  | Macaca fascicularis Papillomavirus 8      | Alpha_12       | MfPV8REF  |
| MfPV9  | Macaca fascicularis Papillomavirus 9      | Alpha_12       | MfPV9REF  |
| MfuPV1 | Macaca fuscata Papillomavirus 1           | Alpha          | MfuPV1REF |
| MmiPV1 | Micromys minutus Papillomavirus 1         | Pi_2           | MmiPV1REF |
| MmoPV1 | Molossus molossus Papillomavirus 1        | Unclassified   | MmoPV1REF |
| MmPV1  | Macaca mulata Papillomavirus 1            | Alpha_12       | MmPV1REF  |
| MmuPV1 | Mus musculus papillomavirus type          | Pi_2           | MmuPV1REF |
| MnPV1  | Mastomys natalensis Papillomavirus 1      | Iota_1         | MnPV1REF  |
| MpPV1  | Mustela putorius papillomavirus 1         | Tau            | MpPV1REF  |
| MrPV1  | Myotis ricketti papillomavirus 1          | Unclassified   | MrPV1REF  |
| MscPV1 | Miniopterus schreibersii Papillomavirus 1 | Unclassified   | MscPV1REF |
| MscPV2 | Miniopterus schreibersii papillomavirus 2 | Dyotau_1       | MscPV2REF |
| MsPV1  | Morelia spilota papillomavirus 1          | Dyomu_1        | MsPV1REF  |
| OaPV1  | Ovis aries Papillomavirus 1               | Delta_3        | OaPV1REF  |
| OaPV2  | Ovis aries Papillomavirus 2               | Delta_3        | OaPV2REF  |
| OaPV3  | Ovis aries Papillomavirus 3               | Dyokappa_1     | OaPV3REF  |
| OaPV4  | Ovis aries Papillomavirus 4               | Delta          | OaPV4REF  |
| OcPV1  | Oryctolagus cuniculus Papillomavirus 2    | Kappa_1        | OcPV1REF  |
| OvPV1  | Odocoileus virginianus Papillomavirus 1   | Delta_2        | OvPV1REF  |
| PaPV1  | Pygoscelis adeliae papillomavirus         | Treisepsilon_1 | PaPV1REF  |
| PaPV2  | Pygoscelis adeliae Papillomavirus 2       | Treisepsilon   | PaPV2REF  |
| PcPV1  | Puma concolor Papillomavirus 1            | Lambda_1       | PcPV1REF  |
| PePV1  | Psittacus erithacus Papillomavirus 1      | Theta_1        | PePV1REF  |
| PhPV1  | Papio hamadryas papillomavirus 1          | Alpha_12       | PhPV1REF  |
| PlpPV1 | Panthera leo persica Papillomavirus       | Lambda_1       | PlpPV1REF |
| PIPV1  | Procyon lotor Papillomavirus 1            | Lambda_4       | PIPV1REF  |
| PmPV1  | Peromyscus papillomavirus 1               | Iota           | PmPV1REF  |

|        |                                               |              |           |
|--------|-----------------------------------------------|--------------|-----------|
| PphPV1 | Phocoena phocoena papillomavirus              | Omikron_1    | PphPV1REF |
| PphPV2 | Phocoena phocoena papillomavirus              | Upsilon_3    | PphPV2REF |
| PphPV4 | Phocoena phocoena papillomavirus              | Dyopi_1      | PphPV4REF |
| PpPV1  | Pan paniscus Papillomavirus 1                 | Alpha_10     | PpPV1REF  |
| PpuPV1 | Pudu Papillomavirus 1                         | Unclassified | PpuPV1REF |
| PsPV1  | Phocoena spinipinnis Papillomavirus           | Omikron_1    | PsPV1REF  |
| PsuPV1 | Phodopus sungorus papillomavirus type         | Pi_1         | PsuPV1REF |
| RalPV1 | Rusa alfredi Papillomavirus 1                 | Delta        | RalPV1REF |
| RaPV1  | Rousettus aegyptiacus Papillomavirus 1        | Psi_1        | RaPV1REF  |
| RfPV1  | Rhinolophus ferrumequinum papillomavirus type | Treisdelta_1 | RfPV1REF  |
| RnPV1  | Rattus norvegicus Papillomavirus 1            | Pi_2         | RnPV1REF  |
| RnPV2  | Rattus norvegicus Papillomavirus 2            | Iota_1       | RnPV2REF  |
| RnPV3  | Rattus norvegicus Papillomavirus 3            | Iota_1       | RnPV3REF  |
| RrPV1  | Rupicapra rupicapra papillomavirus 1          | Dyokappa_2   | RrPV1REF  |
| RtiPV1 | Rusa timorensis Papillomavirus 1              | Unclassified | RtiPV1REF |
| RtiPV2 | Rusa timorensis Papillomavirus 2              | Unclassified | RtiPV2REF |
| RtPV1  | Rangifer tarandus Papillomavirus 1            | Delta_1      | RtPV1REF  |
| RtPV2  | Rangifer tarandus papillomavirus 2            | Xi_3         | RtPV2REF  |
| SaPV1  | Sparus aurata Papillomavirus 1                | Unclassified | SaPV1REF  |
| ScPV1  | Serinus canaria Papillomavirus 1              | Eta          | ScPV1REF  |
| SfPV1  | Sylvilagus floridanus Papillomavirus 1        | Kappa_2      | SfPV1REF  |
| SscPV1 | Saimiri sciureus papillomavirus 1             | Dyoomikron_1 | SscPV1REF |
| SscPV2 | Saimiri sciureus papillomavirus 2             | Dyoomikron_1 | SscPV2REF |
| SscPV3 | Saimiri sciureus papillomavirus 3             | Dyoomikron_1 | SscPV3REF |
| SsPV1  | Sus scrofa Papillomavirus 1                   | Dyodelta_1   | SsPV1REF  |
| SsPV2  | Sus scrofa Papillomavirus 2                   | Unclassified | SsPV2REF  |
| TeV1   | Talpa europaea papillomavirus 1               | Dyophi_1     | TeV1REF   |
| TmPV1  | Trichechus manatus latirostris Papillomavirus | Rho_1        | TmPV1REF  |
| TmPV2  | Trichechus manatus latirostris papillomavirus | Rho_1        | TmPV2REF  |
| TmPV3  | Trichechus manatus papillomavirus 3           | Rho_2        | TmPV3REF  |
| TmPV4  | Trichechus manatus papillomavirus 4           | Rho_2        | TmPV4REF  |
| TtPV1  | Tursiops truncatus Papillomavirus 1           | Upsilon_1    | TtPV1REF  |
| TtPV2  | Tursiops truncatus Papillomavirus 2           | Upsilon_2    | TtPV2REF  |
| TtPV3  | Tursiops truncatus Papillomavirus 3           | Upsilon_1    | TtPV3REF  |
| TtPV4  | Tursiops truncatus papillomavirus 4           | Upsilon_1    | TtPV4REF  |
| TtPV5  | Tursiops truncatus papillomavirus 5           | Omikron_1    | TtPV5REF  |
| TtPV6  | Tursiops truncatus papillomavirus 6           | Omikron_1    | TtPV6REF  |
| TtPV7  | Tursiops truncatus papillomavirus 7           | Upsilon_1    | TtPV7REF  |
| TtPV8  | Tursiops truncatus Papillomavirus 8           | Dyopi        | TtPV8REF  |
| TtPV9  | Tursiops truncatus Papillomavirus 9           | Omikron      | TtPV9REF  |
| UmPV1  | Ursus maritimus Papillomavirus 1              | Omega_1      | UmPV1REF  |
| UuPV1  | Uncia uncia Papillomavirus 1                  | Lambda_1     | UuPV1REF  |
| VvPV1  | Vulpes vulpes papillomavirus 1                | Treiseta     | VvPV1REF  |
| ZcPV1  | Zalophus californianus papillomavirus 1       | Dyonu_1      | ZcPV1REF  |



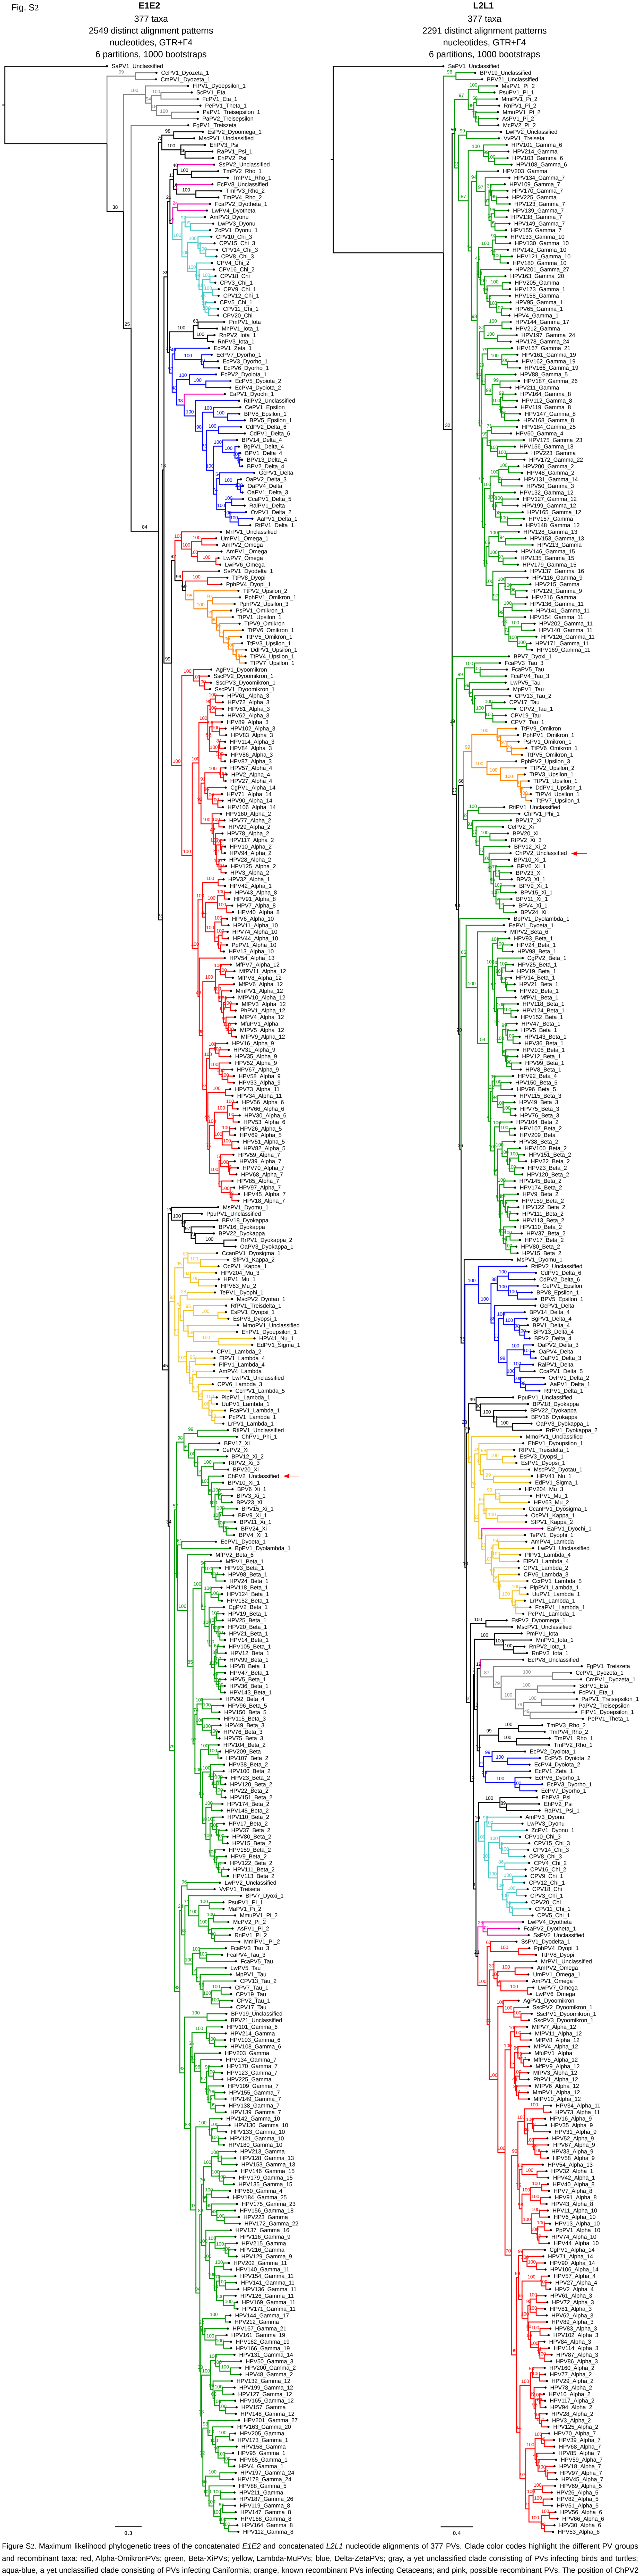

Figure S2. Maximum likelihood phylogenetic trees of the concatenated *E1E2* and concatenated *L2L1* nucleotide alignments of 377 PVs. Clade color codes highlight the different PV groups and recombinant taxa: red, alpha-Omikron/PVs; green, beta-XiPVs; yellow, lambda-MuPVs; blue, Delta-ZetaPVs; gray, a yet unclassified clade consisting of PVs infecting birds and turtles; aqua-blue, a yet unclassified clade consisting of PVs infecting California; orange, lambda-KuPVs; and pink, possible recombinant PVs. The position of HPV2 is indicated with a red arrow. Values on branches correspond to ML bootstrap support values.



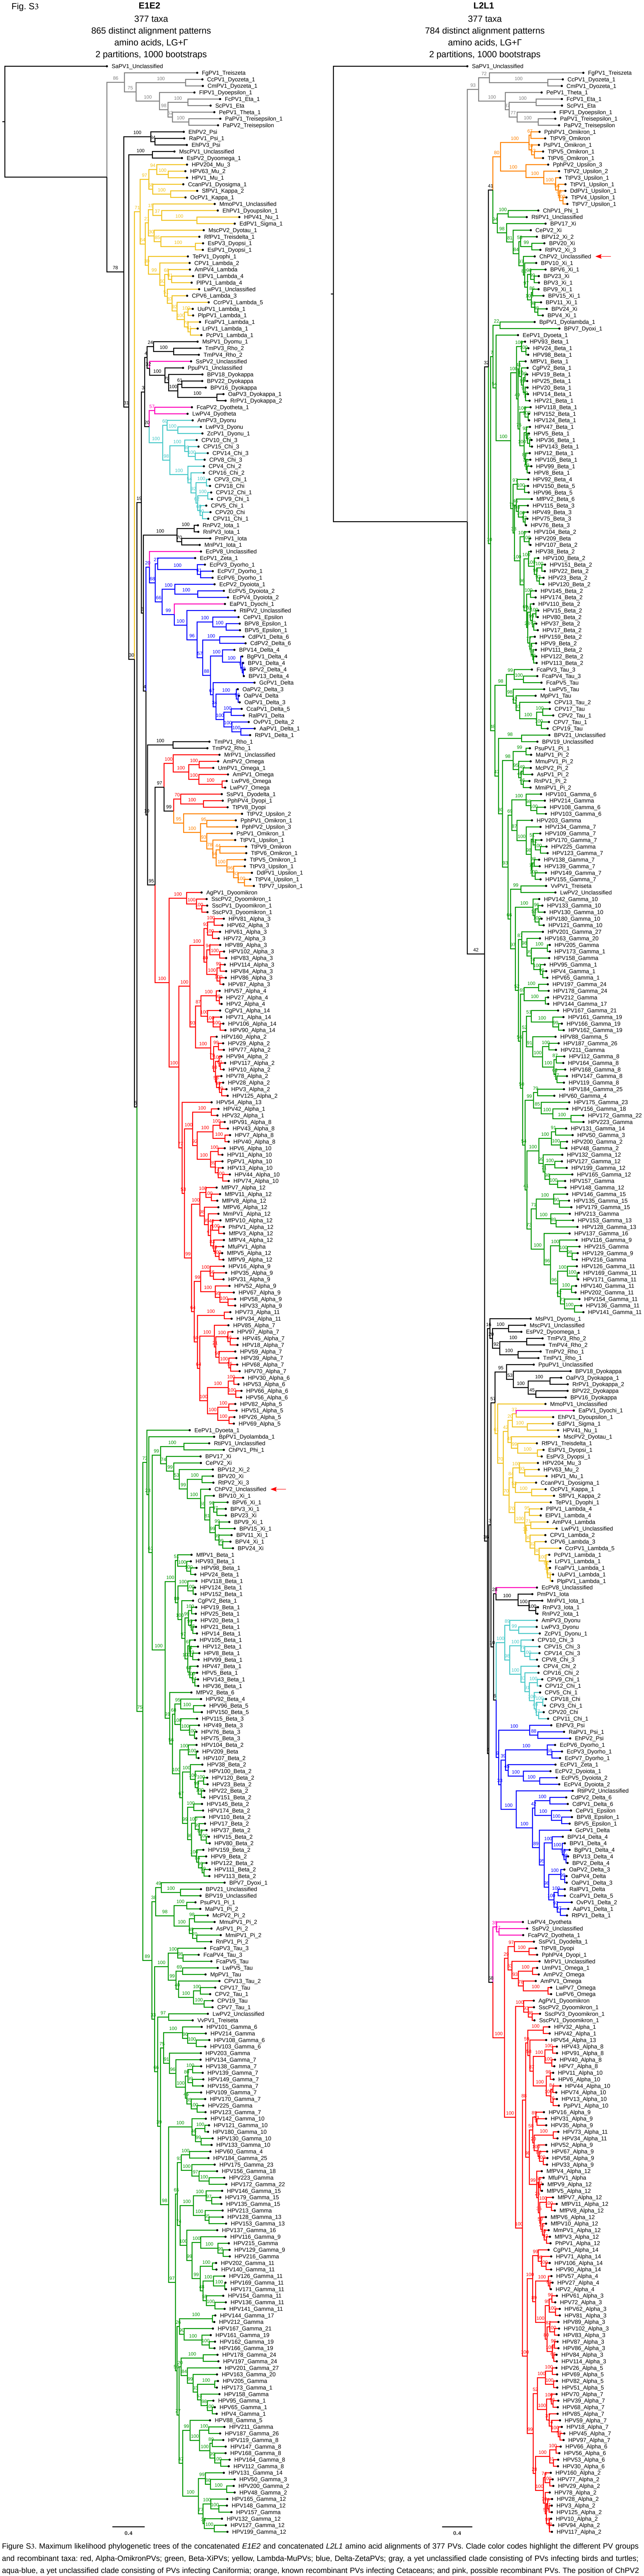



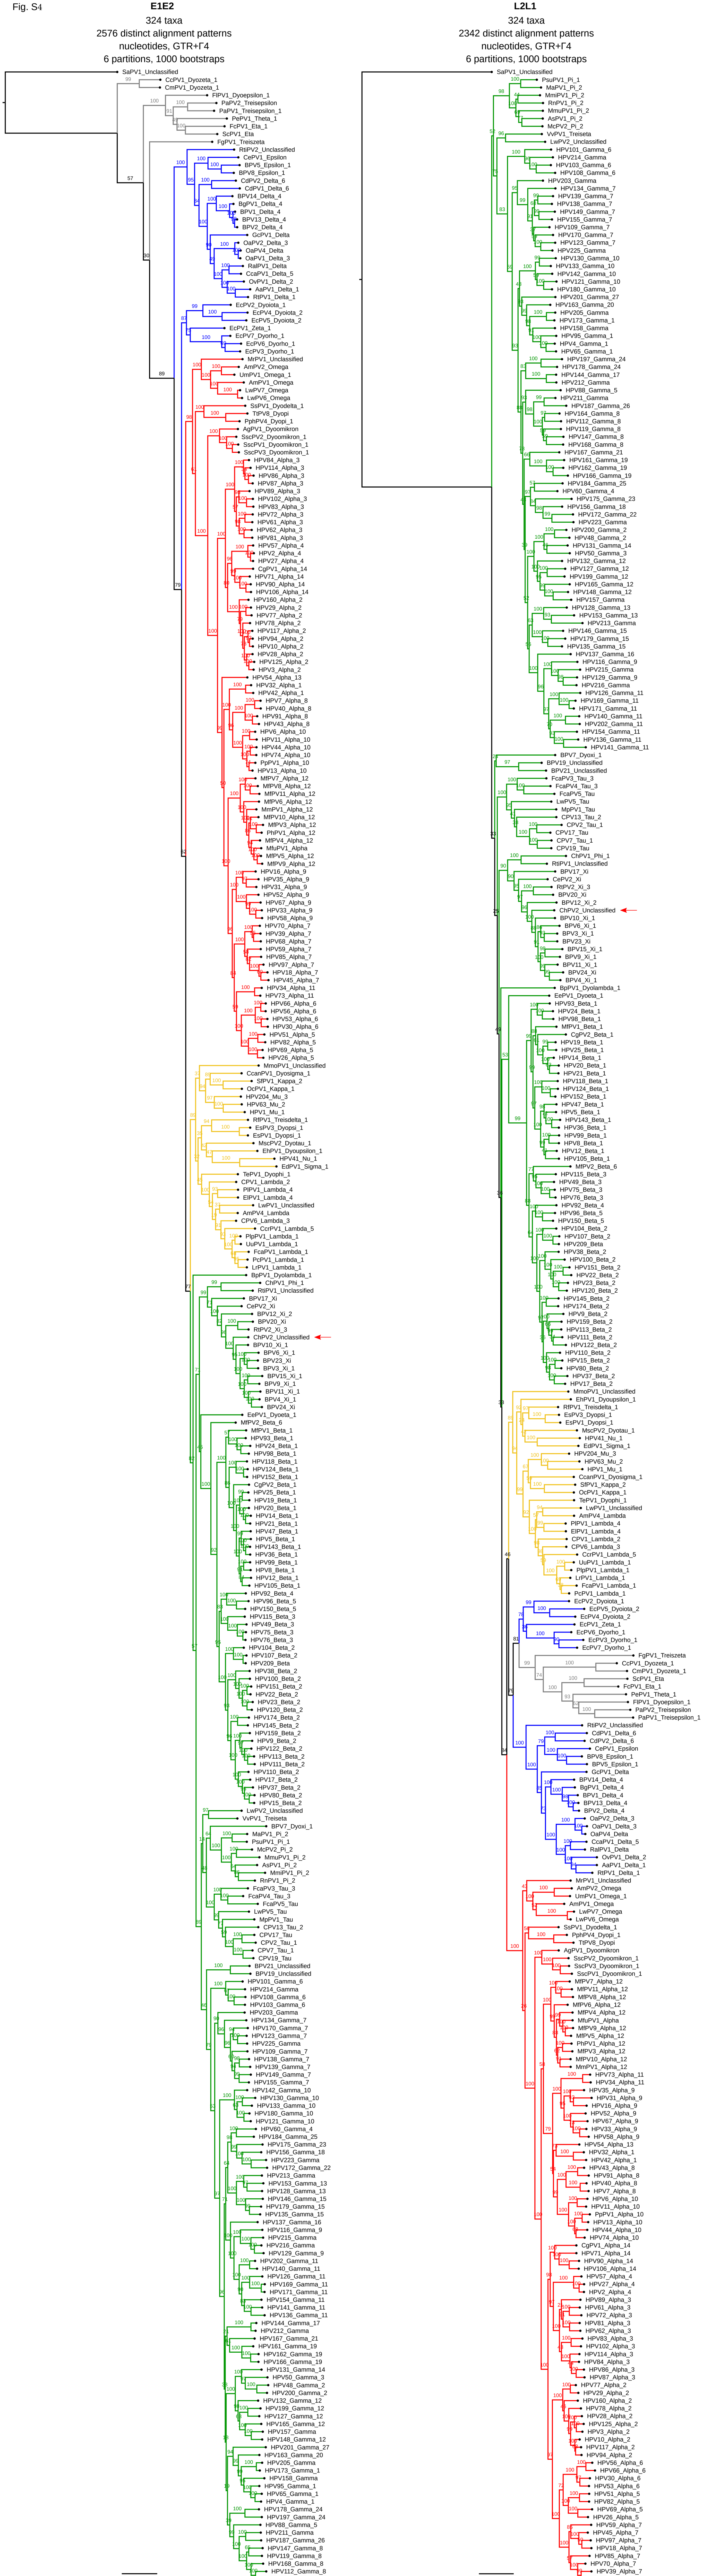

Figure S4. Maximum likelihood phylogenetic trees of the concatenated *EIE2* and concatenated *L2L1* alignments of 324 PVs. Clade color codes highlight the different PV groups: red, Alpha-OmikronPVs; green, Beta-XiPVs; yellow, Lambda-MuPVs; blue, Delta-ZetaPVs; and gray, a yet unclassified clade consisting of PVs infecting birds and turtles. The position of CHPV2 is indicated with a red arrow. Values on branches correspond to ML bootstrap support values.



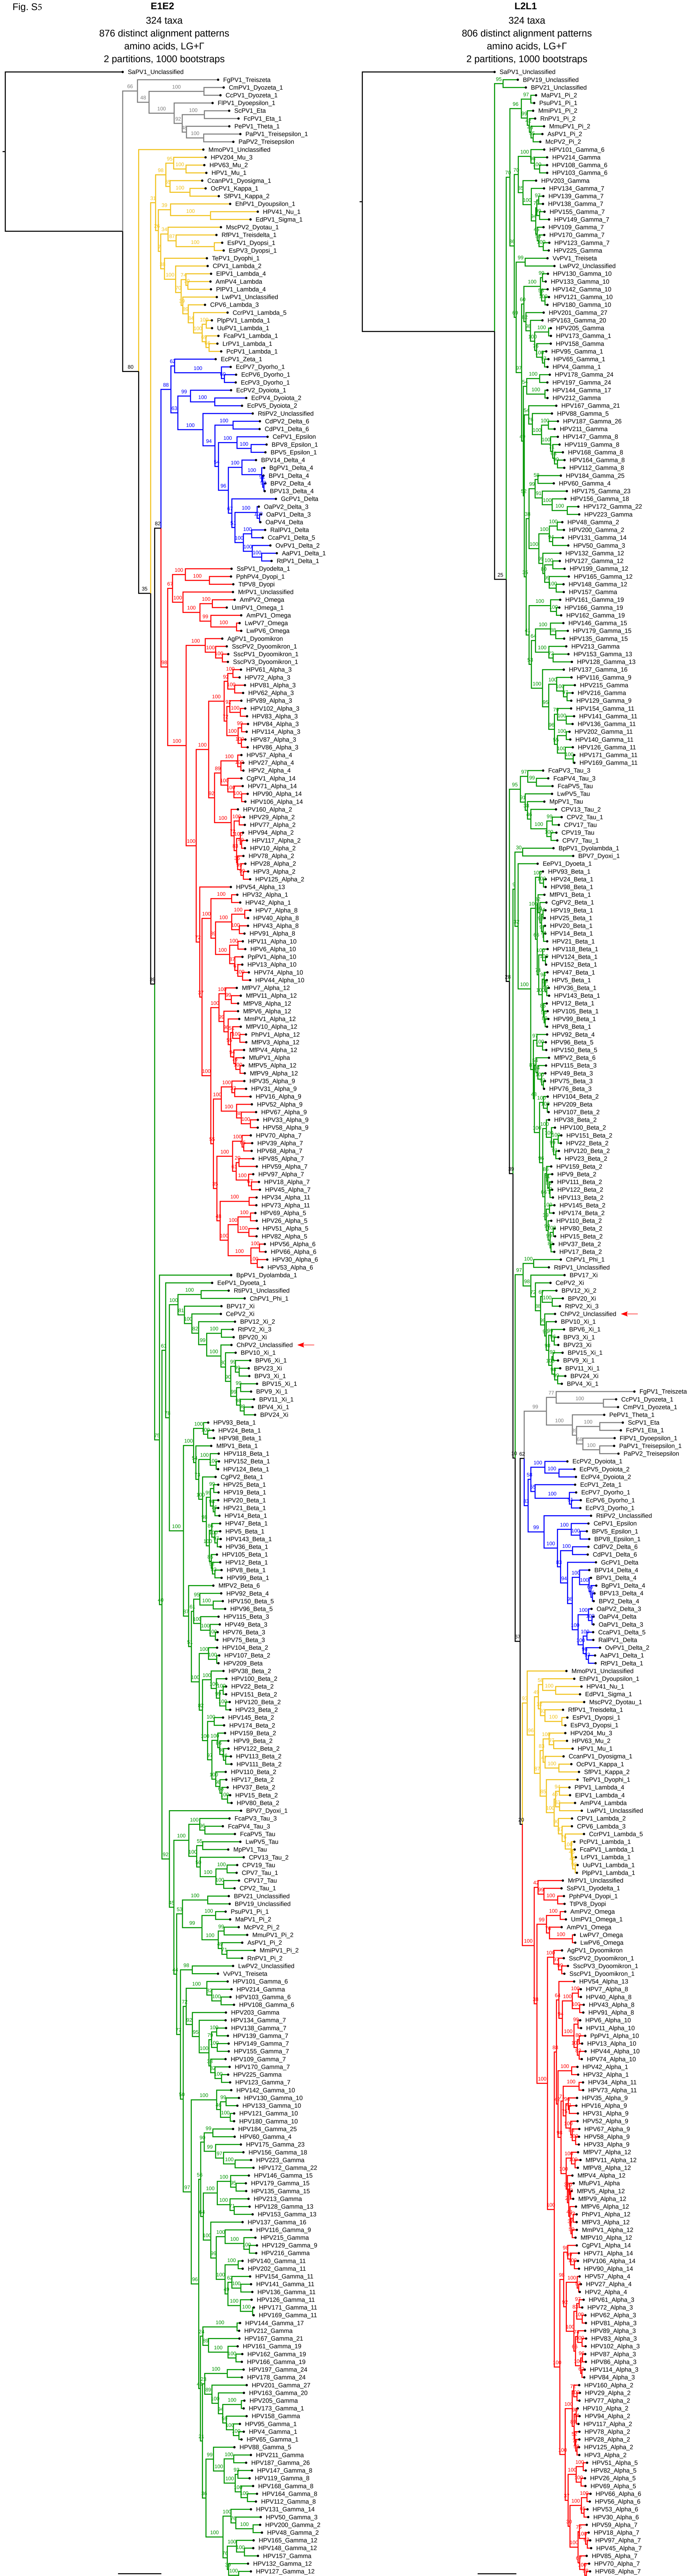



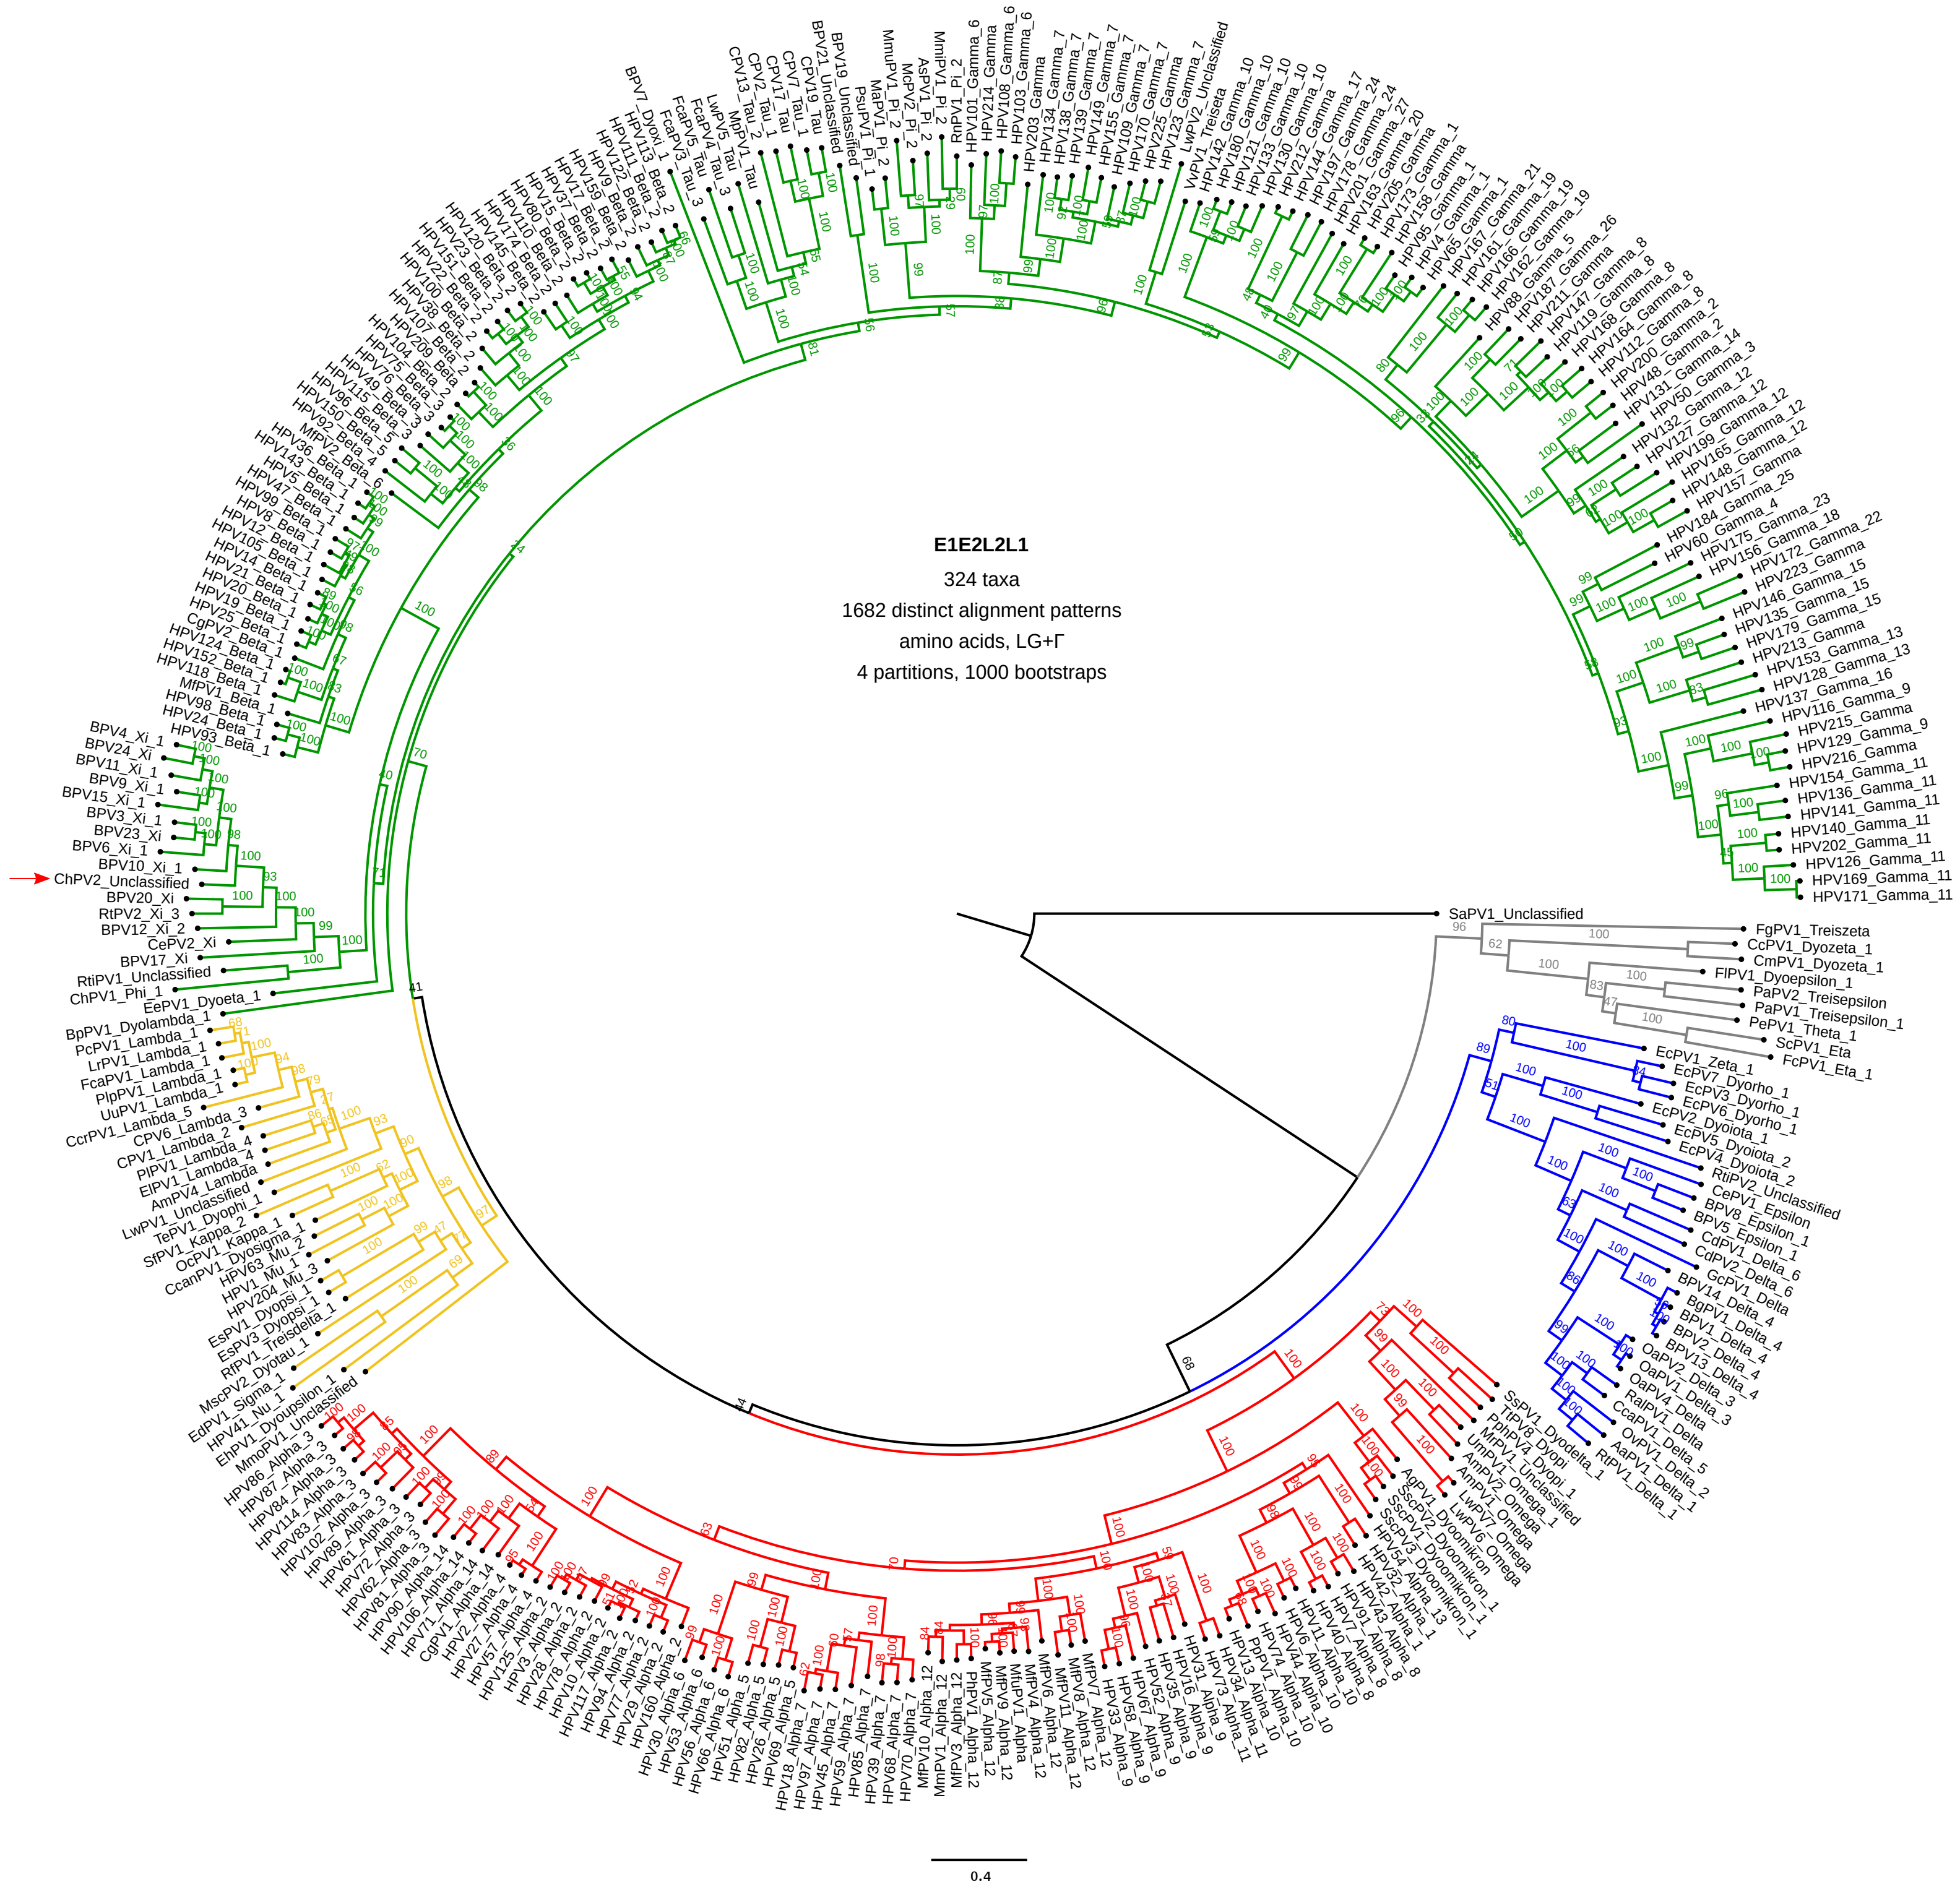

Figure S6. Maximum likelihood phylogenetic tree of the concatenated *E1E2L2L1* amino acid alignments of 324 PVs. Clade color codes highlight the different PV groups: red, Alpha-OmikronPVs; green, Beta-XIPVs; yellow, Lambda-MuPVs; blue, Delta-ZetaPVs; and gray, a yet unclassified clade consisting of PVs infecting birds and turtles. The position of ChPV2 is indicated with a red arrow. Values on branches correspond to ML bootstrap support values.



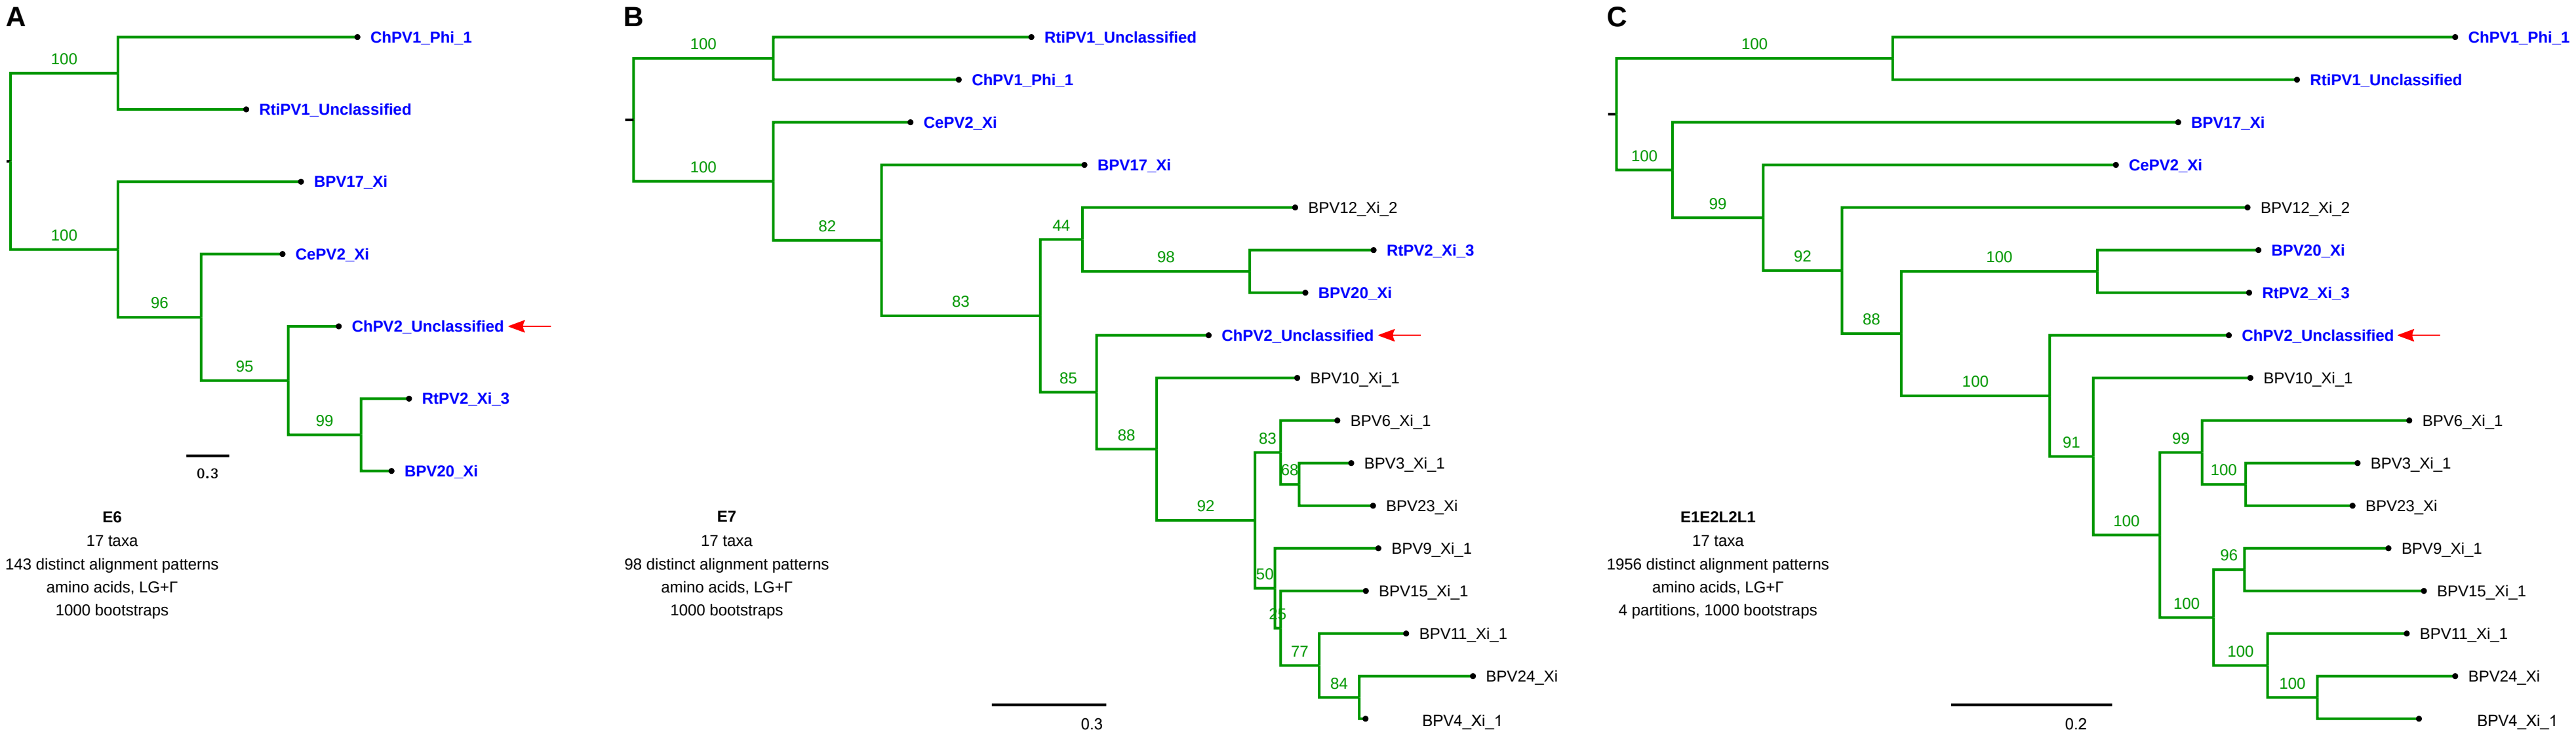

Figure S7. Maximum likelihood phylogenetic trees of *E6* (A), *E7* (B) and the concatenated *E1E2L2L1* (C) amino acid alignments of 17 PVs. The taxa highlighted in blue contain both the *E6* and *E7* oncogenes in their genomes, while the other taxa contain only *E7*. The position of ChPV2 is indicated with a red arrow. Values on branches correspond to ML bootstrap support values.

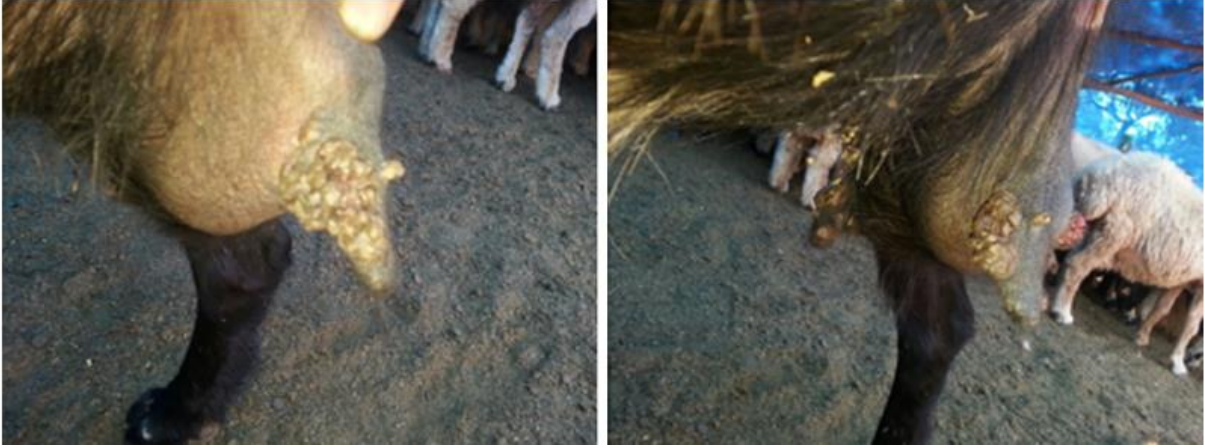

Figure S8: Macroscopic view of teat papilloma of a Damascus (Shami) goat taken from (12)

12: Dogan F, Dorttas SD, Bilge Dagalp S, Ataseven VS, Alkan F. A teat papillomatosis case in a Damascus goat (Shami goat) in Hatay province, Turkey: a new putative papillomavirus? Arch Virol. 2018 DOI: 10.1007/s00705-018-3781-2.
